# Supplementary material for: A Phase Ib Study of Onvansertib, a Novel Oral PLK1 Inhibitor, in Combination Therapy for Patients with Relapsed or Refractory Acute Myeloid Leukemia
Source: Oxford University Press journal article supplement (doi:10.1158/1078-0432.ccr-20-2586), 2020-09-30
Supplement: 10780432ccr202586-sup-246451_2_supp_6561589_qg7mhh.xlsx [file 10780432ccr202586-sup-246451_2_supp_6561589_qg7mhh.xlsx]

## Sheet: Sheet1
Library	Symbol	HGVSp	HGVSc	Allelic Frequency	COSMIC ID
TROV-052-01-002-EDTA-C1D1-0-hr-EL1_S3_L001_R1_001_variants.csv	SRSF2	NP_001182356.1:p.Pro95Arg	NM_001195427.1:c.284C>G	0.1365	COSM211661
TROV-052-01-002-EDTA-C1D1-0-hr-EL1_S3_L001_R1_001_variants.csv	STAG2	NP_001036214.1:p.Tyr636Ter	NM_001042749.1:c.1908C>G	0.2597	COSM3405922
TROV-052-01-002-Scr-BDNE-EDT-E1_S1_L001_R1_001_variants.csv	SRSF2	NP_001182356.1:p.Pro95Arg	NM_001195427.1:c.284C>G	0.2603	COSM211661
TROV-052-01-002-Scr-BDNE-EDT-E1_S1_L001_R1_001_variants.csv	STAG2	NP_001036214.1:p.Tyr636Ter	NM_001042749.1:c.1908C>G	0.6136	COSM3405922
TROV-052-01-002-EDTA-C1D1-0-hr-EL1_S3_L001_R1_001_variants.csv	ASXL1	NP_056153.2:p.Gly646TrpfsTer12	NM_015338.5:c.1934dup	0.2655	COSM1411076
TROV-052-01-002-Scr-BDNE-EDT-E1_S1_L001_R1_001_variants.csv	ASXL1	NP_056153.2:p.Gly646TrpfsTer12	NM_015338.5:c.1934dup	0.329	COSM1411076
TROV-052-01-021-C1D1-T0-DNE-E1_S1_L001_R1_001_variants.csv	TET2	NP_001120680.1:p.Val1718Leu	NM_001127208.2:c.5152G>T	0.4937	COSM41742
TROV-052-01-021-Scr-BDNE-E1_S6_L001_R1_001_variants.csv	TET2	NP_001120680.1:p.Val1718Leu	NM_001127208.2:c.5152G>T	0.529	COSM41742
TROV-052-01-024-C1D1-T0-DNE-E1_S4_L001_R1_001_variants.csv	DDX41	NP_001308661.1:p.Arg399His	NM_001321732.1:c.1196G>A	0.078	COSM166515
TROV-052-01-024-C1D1-T0-DNE-E1_S4_L001_R1_001_variants.csv	NRAS	NP_002515.1:p.Gly12Asp	NM_002524.4:c.35G>A	0.1757	COSM564
TROV-052-01-024-Scr-BDNE-E1_S3_L001_R1_001_variants.csv	DDX41	NP_001308661.1:p.Arg399His	NM_001321732.1:c.1196G>A	0.0706	COSM166515
TROV-052-01-024-Scr-BDNE-E1_S3_L001_R1_001_variants.csv	NRAS	NP_002515.1:p.Gly12Asp	NM_002524.4:c.35G>A	0.3419	COSM564
TROV-052-03-015-C1D1T3-DNE_S3_L001_R1_001_variants.csv	ASXL1	NP_056153.2:p.Glu635ArgfsTer15	NM_015338.5:c.1900_1922del	0.4076	COSM51200
TROV-052-03-015-C1D1T3-DNE_S3_L001_R1_001_variants.csv	CALR	NP_004334.1:p.Leu367GlnfsTer48	NM_004343.3:c.1100_1145del	0.4974	COSM1738150
TROV-052-03-015-Scr-BDNE_S10_L001_R1_001_variants.csv	ASXL1	NP_056153.2:p.Glu635ArgfsTer15	NM_015338.5:c.1900_1922del	0.3958	COSM51200
TROV-052-03-015-Scr-BDNE_S10_L001_R1_001_variants.csv	CALR	NP_004334.1:p.Leu367GlnfsTer48	NM_004343.3:c.1100_1145del	0.4839	COSM1738150
TROV-052-03-037-Scr-BDNE-E1_S5_L001_R1_001_variants.csv	DNMT3A	NP_001307822.1:p.Trp429Arg	NM_001320893.1:c.1285T>A	0.4745	COSM231558
TROV-052-03-037-Scr-BDNE-E1_S5_L001_R1_001_variants.csv	TET2	NP_001120680.1:p.Cys1298Tyr	NM_001127208.2:c.3893G>A	0.501	COSM87138
TROV-052-03-051-BM-Scr-DNE_S1_L001_R1_001_variants.csv	FLT3	NP_004110.2:p.Val557Ile	NM_004119.2:c.1669G>A	0.5031	COSM28043
TROV-052-03-051-BM-Scr-DNE_S1_L001_R1_001_variants.csv	TP53	NP_000537.3:p.Ser313AlafsTer32	NM_000546.5:c.936del	0.3396	COSM2149481
TROV-052-03-051-C1D1-T0-DNE_S2_L001_R1_001_variants.csv	FLT3	NP_004110.2:p.Val557Ile	NM_004119.2:c.1669G>A	0.5106	COSM28043
TROV-052-03-051-C1D1-T0-DNE_S2_L001_R1_001_variants.csv	TP53	NP_000537.3:p.Ser313AlafsTer32	NM_000546.5:c.936del	0.287	COSM2149481
TROV052-03-056-BM_S3_L001_R1_001_variants.csv	NRAS	NP_002515.1:p.Gly12Asp	NM_002524.4:c.35G>A	0.4324	COSM564
TROV052-03-056-BM_S3_L001_R1_001_variants.csv	TP53	NP_000537.3:p.Leu257Arg	NM_000546.5:c.770T>G	0.8026	COSM44890
TROV052-03-056-C1D1_S4_L001_R1_001_variants.csv	NRAS	NP_002515.1:p.Gly12Asp	NM_002524.4:c.35G>A	0.441	COSM564
TROV052-03-056-C1D1_S4_L001_R1_001_variants.csv	TP53	NP_000537.3:p.Leu257Arg	NM_000546.5:c.770T>G	0.5525	COSM44890
TROV052-03-060-BM_S1_L001_R1_001_variants.csv	ASXL1	NP_056153.2:p.Tyr591Ter	NM_015338.5:c.1773C>G	0.4178	COSM53200
TROV052-03-060-BM_S1_L001_R1_001_variants.csv	DNMT3A	NP_001307822.1:p.Trp178Ter	NM_001320893.1:c.534G>A	0.4093	COSM249799
TROV052-03-060-BM_S1_L001_R1_001_variants.csv	U2AF1	NP_001020374.1:p.Gln157Pro	NM_001025203.1:c.470A>C	0.3995	COSM1318797
TROV052-03-060-C1D1_S2_L001_R1_001_variants.csv	ASXL1	NP_056153.2:p.Tyr591Ter	NM_015338.5:c.1773C>G	0.2361	COSM53200
TROV052-03-060-C1D1_S2_L001_R1_001_variants.csv	DNMT3A	NP_001307822.1:p.Trp178Ter	NM_001320893.1:c.534G>A	0.1903	COSM249799
TROV052-03-060-C1D1_S2_L001_R1_001_variants.csv	U2AF1	NP_001020374.1:p.Gln157Pro	NM_001025203.1:c.470A>C	0.1859	COSM1318797
TROV-052-05-030-C1D1-T0-DNE-E1_S5_L001_R1_001_variants.csv	CDKN2A	NP_478102.2:p.Gly106Arg	NM_058195.3:c.316G>A	0.5302	COSM12488
TROV-052-05-030-C1D1-T0-DNE-E1_S5_L001_R1_001_variants.csv	NRAS	NP_002515.1:p.Gly12Ser	NM_002524.4:c.34G>A	0.0302	COSM563
TROV-052-05-030-C1D1-T0-DNE-E1_S5_L001_R1_001_variants.csv	NRAS	NP_002515.1:p.Gly12Cys	NM_002524.4:c.34G>T	0.3932	COSM562
TROV-052-05-030-C1D1-T0-DNE-E1_S5_L001_R1_001_variants.csv	SRSF2	NP_001182356.1:p.Pro95Arg	NM_001195427.1:c.284C>G	0.5279	COSM211661
TROV-052-05-030-Scr-BDNE-E1_S4_L001_R1_001_variants.csv	CDKN2A	NP_478102.2:p.Gly106Arg	NM_058195.3:c.316G>A	0.4876	COSM12488
TROV-052-05-030-Scr-BDNE-E1_S4_L001_R1_001_variants.csv	NRAS	NP_002515.1:p.Gly12Ser	NM_002524.4:c.34G>A	0.0492	COSM563
TROV-052-05-030-Scr-BDNE-E1_S4_L001_R1_001_variants.csv	NRAS	NP_002515.1:p.Gly12Cys	NM_002524.4:c.34G>T	0.2769	COSM562
TROV-052-05-030-Scr-BDNE-E1_S4_L001_R1_001_variants.csv	SRSF2	NP_001182356.1:p.Pro95Arg	NM_001195427.1:c.284C>G	0.4502	COSM211661
TROV-052-05-043-C1D1-T0-DNE_S6_L001_R1_001_variants.csv	NRAS	NP_002515.1:p.Gly12Val	NM_002524.4:c.35G>T	0.409	COSM566
TROV-052-05-043-C1D1-T0-DNE_S6_L001_R1_001_variants.csv	SRSF2	NP_001182356.1:p.Pro95His	NM_001195427.1:c.284C>A	0.4824	COSM211504
TROV-052-05-043-Scr-DNE_S5_L001_R1_001_variants.csv	NRAS	NP_002515.1:p.Gly12Val	NM_002524.4:c.35G>T	0.32	COSM566
TROV-052-05-043-Scr-DNE_S5_L001_R1_001_variants.csv	SRSF2	NP_001182356.1:p.Pro95His	NM_001195427.1:c.284C>A	0.3945	COSM211504
TROV-052-07-004-C1D1-DNE-E1_S5_L001_R1_001_variants.csv	TP53	NP_000537.3:p.Lys319Ter	NM_000546.5:c.955A>T	0.5837	COSM11658
TROV-052-07-008-C1D1-T3-DNE-E2_S4_L001_R1_001_variants.csv	ASXL1	NP_056153.2:p.Glu635ArgfsTer15	NM_015338.5:c.1888_1910delCACCACTGCCATAGAGAGGCGGC	0.2704	COSM51200
TROV-052-07-008-C1D1-T3-DNE-E2_S4_L001_R1_001_variants.csv	FLT3	NP_004110.2:p.Asp835Glu	NM_004119.2:c.2505T>G	0.2665	COSM788
TROV-052-07-008-C1D1-T3-DNE-E2_S4_L001_R1_001_variants.csv	FLT3	NP_004110.2:p.Asp324Asn	NM_004119.2:c.970G>A	0.184	COSM28040
TROV-052-07-009-C1D1-T3-DNE-E2_S6_L001_R1_001_variants.csv	FLT3	NP_004110.2:p.Asp835Tyr	NM_004119.2:c.2503G>T	0.4812	COSM783
TROV-052-07-009-C1D1-T3-DNE-E2_S6_L001_R1_001_variants.csv	SF3B1	NP_036565.2:p.Lys666Asn	NM_012433.2:c.1998G>T	0.5254	COSM131557
TROV-052-07-009-Scr-BDNE-E1_S5_L001_R1_001_variants.csv	FLT3	NP_004110.2:p.Asp835Tyr	NM_004119.2:c.2503G>T	0.4795	COSM783
TROV-052-07-009-Scr-BDNE-E1_S5_L001_R1_001_variants.csv	SF3B1	NP_036565.2:p.Lys666Asn	NM_012433.2:c.1998G>T	0.5829	COSM131557
TROV-052-07-010-Scr-BDNE-E1_S8_L001_R1_001_variants.csv	RUNX1	NP_001001890.1:p.Asp171Asn	NM_001001890.2:c.511G>A	0.4668	COSM24721
TROV-052-07-010-Scr-BDNE-E1_S8_L001_R1_001_variants.csv	SRSF2	NP_001182356.1:p.Pro95Arg	NM_001195427.1:c.284C>G	0.5	COSM211661
TROV052-07-010-C1D1T0-DNE_S3_L001_R1_001_variants.csv	RUNX1	NP_001001890.1:p.Asp171Asn	NM_001001890.2:c.511G>A	0.4769	COSM24721
TROV052-07-010-C1D1T0-DNE_S3_L001_R1_001_variants.csv	SRSF2	NP_001182356.1:p.Pro95Arg	NM_001195427.1:c.284C>G	0.5242	COSM211661
TROV052-07-011-C1D1T3-DNE_S6_L001_R1_001_variants.csv	TP53	NP_000537.3:p.Glu258Ala	NM_000546.5:c.773A>C	0.7886	COSM1268362
TROV052-07-013-C1D1T0-DNE_S8_L001_R1_001_variants.csv	GATA2	NP_001139133.1:p.Leu321Pro	NM_001145661.1:c.962T>C	0.2829	COSM249844
TROV052-07-013-C1D1T0-DNE_S8_L001_R1_001_variants.csv	PHF6	NP_001015877.1:p.Arg319Ter	NM_001015877.1:c.955C>T	0.5612	COSM144626
TROV052-07-013-Scr-BDNE_S7_L001_R1_001_variants.csv	GATA2	NP_001139133.1:p.Leu321Pro	NM_001145661.1:c.962T>C	0.2774	COSM249844
TROV052-07-013-Scr-BDNE_S7_L001_R1_001_variants.csv	PHF6	NP_001015877.1:p.Arg319Ter	NM_001015877.1:c.955C>T	0.5706	COSM144626
TROV-052-07-018-C1D1-T0-DNE-E1_S4_L001_R1_001_variants.csv	TP53	NP_000537.3:p.Arg273Cys	NM_000546.5:c.817C>T	0.9103	COSM99933
TROV-052-07-018-Scr-BDNE-E1_S3_L001_R1_001_variants.csv	TP53	NP_000537.3:p.Arg273Cys	NM_000546.5:c.817C>T	0.9476	COSM99933
TROV-052-07-033-BM-Scr-DNE-E1_S1_L001_R1_001_variants.csv	KRAS	NP_004976.2:p.Gly12Asp	NM_004985.3:c.35G>A	0.1672	COSM521
TROV-052-07-033-BM-Scr-DNE-E1_S1_L001_R1_001_variants.csv	TP53	NP_000537.3:p.Arg273Cys	NM_000546.5:c.817C>T	0.267	COSM99933
TROV-052-07-033-C1D1-T0-DNE-E1_S2_L001_R1_001_variants.csv	KRAS	NP_004976.2:p.Gly12Asp	NM_004985.3:c.35G>A	0.1143	COSM521
TROV-052-07-033-C1D1-T0-DNE-E1_S2_L001_R1_001_variants.csv	TP53	NP_000537.3:p.Arg273Cys	NM_000546.5:c.817C>T	0.1391	COSM99933
TROV-052-07-035-C1D1-T0-DNE-E1_S4_L001_R1_001_variants.csv	ASXL1	NP_056153.2:p.Glu1102Asp	NM_015338.5:c.3306G>T	0.4802	COSM36205
TROV-052-07-035-C1D1-T0-DNE-E1_S4_L001_R1_001_variants.csv	IDH2	NP_001276839.1:p.Arg88Gln	NM_001289910.1:c.263G>A	0.3356	COSM41590
TROV-052-07-035-C1D1-T0-DNE-E1_S4_L001_R1_001_variants.csv	SRSF2	NP_001182356.1:p.Pro95His	NM_001195427.1:c.284C>A	0.3163	COSM211504
TROV-052-07-035-Scr-DNE-E1_S3_L001_R1_001_variants.csv	ASXL1	NP_056153.2:p.Glu1102Asp	NM_015338.5:c.3306G>T	0.499	COSM36205
TROV-052-07-035-Scr-DNE-E1_S3_L001_R1_001_variants.csv	IDH2	NP_001276839.1:p.Arg88Gln	NM_001289910.1:c.263G>A	0.4472	COSM41590
TROV-052-07-035-Scr-DNE-E1_S3_L001_R1_001_variants.csv	SRSF2	NP_001182356.1:p.Pro95His	NM_001195427.1:c.284C>A	0.4186	COSM211504
TROV-052-07-036-BM-Scr-DNE-E1_S5_L001_R1_001_variants.csv	TET2	NP_001120680.1:p.Arg1465Ter	NM_001127208.2:c.4393C>T	0.2072	COSM42016
TROV-052-07-036-C1D1-T0-DNE-E1_S6_L001_R1_001_variants.csv	TET2	NP_001120680.1:p.Arg1465Ter	NM_001127208.2:c.4393C>T	0.2399	COSM42016
TROV052-07-038-BM_S1_L001_R1_001_variants.csv	ASXL1	NP_056153.2:p.Gly646TrpfsTer12	NM_015338.5:c.1934dup	0.387	COSM1411076
TROV052-07-038-BM_S1_L001_R1_001_variants.csv	NRAS	NP_002515.1:p.Gly12Asp	NM_002524.4:c.35G>A	0.5068	COSM564
TROV052-07-038-BM_S1_L001_R1_001_variants.csv	SRSF2	NP_001182356.1:p.Pro95His	NM_001195427.1:c.284C>A	0.5192	COSM211504
TROV052-07-038-C1D1-T3_S2_L001_R1_001_variants.csv	ASXL1	NP_056153.2:p.Gly646TrpfsTer12	NM_015338.5:c.1934dup	0.1854	COSM1411076
TROV052-07-038-C1D1-T3_S2_L001_R1_001_variants.csv	NRAS	NP_002515.1:p.Gly12Asp	NM_002524.4:c.35G>A	0.1212	COSM564
TROV052-07-038-C1D1-T3_S2_L001_R1_001_variants.csv	SRSF2	NP_001182356.1:p.Pro95His	NM_001195427.1:c.284C>A	0.2282	COSM211504
TROV052-07-059-C1D1-T3_S5_L001_R1_001_variants.csv	CDKN2A	NP_000068.1:p.Ala4_Pro11dup	NM_000077.4:c.9_32dup	0.259	COSM13442
TROV052-07-059-C1D1-T3_S5_L001_R1_001_variants.csv	DNMT3A	NP_001307822.1:p.Arg730Cys	NM_001320893.1:c.2188C>T	0.2769	COSM53042
TROV052-07-059-C1D1-T3_S5_L001_R1_001_variants.csv	TP53	NP_000537.3:p.Lys132Arg	NM_000546.5:c.395A>G	0.0644	COSM1646844
TROV052-07-063-BM_S5_L001_R1_001_variants.csv	TET2	NP_001120680.1:p.Val1718Leu	NM_001127208.2:c.5152G>T	0.0903	COSM41742
TROV052-07-063-BM_S5_L001_R1_001_variants.csv	TP53	NP_000537.3:p.Arg175His	NM_000546.5:c.524G>A	0.6381	COSM99022
TROV052-07-063-C1D1_S6_L001_R1_001_variants.csv	TET2	NP_001120680.1:p.Val1718Leu	NM_001127208.2:c.5152G>T	0.3953	COSM41742
TROV052-07-063-C1D1_S6_L001_R1_001_variants.csv	TP53	NP_000537.3:p.Arg175His	NM_000546.5:c.524G>A	0.0766	COSM99022
TROV-052-08-027-C1D1-T3-DNE-E1_S2_L001_R1_001_variants.csv	TP53	NP_000537.3:p.Arg248Gln	NM_000546.5:c.743G>A	0.6071	COSM99602
TROV-052-08-027-Scr-BDNE-E1_S1_L001_R1_001_variants.csv	TP53	NP_000537.3:p.Arg248Gln	NM_000546.5:c.743G>A	0.8388	COSM99602
TROV-052-08-050-C1D1-T0-DNE_S3_L001_R1_001_variants.csv	IDH2	NP_001276839.1:p.Arg88Gln	NM_001289910.1:c.263G>A	0.3684	COSM41590
TROV-052-08-050-C1D1-T0-DNE_S3_L001_R1_001_variants.csv	JAK2	NP_001309123.1:p.Asn1108Ser	NM_001322194.1:c.3323A>G	0.3958	COSM33708
TROV-052-08-050-C1D1-T0-DNE_S3_L001_R1_001_variants.csv	NPM1	NP_002511.1:p.Trp288CysfsTer12	NM_002520.6:c.860_863dup	0.2594	COSM158604
TROV052-08-055-C1D1_S1_L001_R1_001_variants.csv	ASXL1	NP_056153.2:p.Gly646TrpfsTer12	NM_015338.5:c.1934dup	0.3645	COSM1411076
TROV052-08-055-C1D1_S1_L001_R1_001_variants.csv	DNMT3A	NP_001307822.1:p.Arg483Trp	NM_001320893.1:c.1447C>T	0.4696	COSM1407108
TROV052-08-055-C1D1_S1_L001_R1_001_variants.csv	RUNX1	NP_001001890.1:p.Arg80Cys	NM_001001890.2:c.238C>T	0.4816	COSM24736
TROV052-08-055-C1D1_S1_L001_R1_001_variants.csv	TET2	NP_001120680.1:p.Gln1687Ter	NM_001127208.2:c.5059C>T	0.4837	COSM43421
TROV052-08-058-C1D1_S1_L001_R1_001_variants.csv	NRAS	NP_002515.1:p.Gly12Asp	NM_002524.4:c.35G>A	0.0742	COSM564
TROV052-08-061-C1D1_S3_L001_R1_001_variants.csv	DNMT3A	NP_001307822.1:p.Arg730His	NM_001320893.1:c.2189G>A	0.4209	COSM52944
TROV052-08-061-C1D1_S3_L001_R1_001_variants.csv	NPM1	NP_002511.1:p.Trp288CysfsTer12	NM_002520.6:c.860_863dup	0.2382	COSM158604
TROV052-08-061-C1D1_S3_L001_R1_001_variants.csv	SF3B1	NP_036565.2:p.Lys666Arg	NM_012433.2:c.1997A>G	0.4156	COSM131553
TROV-052-09-026-C1D1-T0-DNE-E1_S4_L001_R1_001_variants.csv	TP53	NP_000537.3:p.Arg306Ter	NM_000546.5:c.916C>T	0.5947	COSM3388168
TROV-052-09-026-Scr-BDNE-E1_S3_L001_R1_001_variants.csv	TP53	NP_000537.3:p.Arg306Ter	NM_000546.5:c.916C>T	0.6155	COSM3388168
TROV-052-09-032-C1D1-T0-DNE-E1_S5_L001_R1_001_variants.csv	TP53	NP_000537.3:p.Tyr163Cys	NM_000546.5:c.488A>G	0.4817	COSM10808
TROV-052-09-032-Scr-DNE-E1_S4_L001_R1_001_variants.csv	TP53	NP_000537.3:p.Tyr163Cys	NM_000546.5:c.488A>G	0.5308	COSM10808
TROV-052-09-034-Scr-DNE-E1_S1_L001_R1_001_variants.csv	KRAS	NP_004976.2:p.Gly60Val	NM_004985.3:c.179G>T	0.0422	COSM1667041
TROV-052-09-034-Scr-DNE-E1_S1_L001_R1_001_variants.csv	CSF3R	NP_000751.1:p.Thr618Ile	NM_000760.3:c.1853C>T	0.3521
TROV-052-09-054-BM-Scr-DNE_S7_L001_R1_001_variants.csv	ASXL1	NP_056153.2:p.Gly646TrpfsTer12	NM_015338.5:c.1934dup	0.3722	COSM1411076
TROV-052-09-054-BM-Scr-DNE_S7_L001_R1_001_variants.csv	DNMT3A	NP_001307822.1:p.Arg483Trp	NM_001320893.1:c.1447C>T	0.4212	COSM1407108
TROV-052-09-054-BM-Scr-DNE_S7_L001_R1_001_variants.csv	RUNX1	NP_001001890.1:p.Arg80Cys	NM_001001890.2:c.238C>T	0.4395	COSM24736
TROV-052-09-054-BM-Scr-DNE_S7_L001_R1_001_variants.csv	TET2	NP_001120680.1:p.Gln1687Ter	NM_001127208.2:c.5059C>T	0.4674	COSM43421
TROV-052-09-054-C1D1-T0-DNE_S8_L001_R1_001_variants.csv	ASXL1	NP_056153.2:p.Gly646TrpfsTer12	NM_015338.5:c.1934dup	0.3434	COSM1411076
TROV-052-09-054-C1D1-T0-DNE_S8_L001_R1_001_variants.csv	DNMT3A	NP_001307822.1:p.Arg483Trp	NM_001320893.1:c.1447C>T	0.483	COSM1407108
TROV-052-09-054-C1D1-T0-DNE_S8_L001_R1_001_variants.csv	RUNX1	NP_001001890.1:p.Arg80Cys	NM_001001890.2:c.238C>T	0.4739	COSM24736
TROV-052-09-054-C1D1-T0-DNE_S8_L001_R1_001_variants.csv	TET2	NP_001120680.1:p.Gln1687Ter	NM_001127208.2:c.5059C>T	0.4643	COSM43421
TROV052-09-064-C1D1_S6_L001_R1_001_variants.csv	SF3B1	NP_036565.2:p.Lys700Glu	NM_012433.2:c.2098A>G	0.0272	COSM84677
TROV-052-11-019-C1D1-T0-DNE-E1_S7_L001_R1_001_variants.csv	SF3B1	NP_036565.2:p.Lys666Asn	NM_012433.2:c.1998G>C	0.3802	COSM132937
TROV-052-11-019-C1D1-T0-DNE-E1_S7_L001_R1_001_variants.csv	TET2	NP_001120680.1:p.Arg1359His	NM_001127208.2:c.4076G>A	0.0903	COSM42055
TROV-052-11-019-C1D1-T0-DNE-E1_S7_L001_R1_001_variants.csv	U2AF1	NP_001020374.1:p.Arg156His	NM_001025203.1:c.467G>A	0.0831	COSM1235014
TROV-052-11-019-Scr-BDNE-E1_S5_L001_R1_001_variants.csv	SF3B1	NP_036565.2:p.Lys666Asn	NM_012433.2:c.1998G>C	0.4081	COSM132937
TROV-052-11-019-Scr-BDNE-E1_S5_L001_R1_001_variants.csv	TET2	NP_001120680.1:p.Arg1359His	NM_001127208.2:c.4076G>A	0.0671	COSM42055
TROV-052-11-019-Scr-BDNE-E1_S5_L001_R1_001_variants.csv	U2AF1	NP_001020374.1:p.Arg156His	NM_001025203.1:c.467G>A	0.1158	COSM1235014
TROV-052-11-040-C1D1-T0-DNE_S1_L001_R1_001_variants.csv	CBL	NP_005179.2:p.Phe418Ser	NM_005188.3:c.1253T>C	0.1436	COSM34070
TROV-052-11-040-C1D1-T0-DNE_S1_L001_R1_001_variants.csv	NPM1	NP_002511.1:p.Trp288CysfsTer12	NM_002520.6:c.860_863dup	0.1184	COSM158604
TROV-052-11-040-C1D1-T0-DNE_S1_L001_R1_001_variants.csv	STAG2		NM_001042749.1:c.386-8A>G	0.2622	COSM1717794
TROV-052-12-041-C1D1-T0-DNE_S8_L001_R1_001_variants.csv	ASXL1	NP_056153.2:p.Gly646TrpfsTer12	NM_015338.5:c.1934dup	0.3516	COSM1411076
TROV-052-12-041-C1D1-T0-DNE_S8_L001_R1_001_variants.csv	ASXL1	NP_056153.2:p.Val1367Ile	NM_015338.5:c.4099G>A	0.4931	COSM723114
TROV-052-12-041-C1D1-T0-DNE_S8_L001_R1_001_variants.csv	NRAS	NP_002515.1:p.Gly12Arg	NM_002524.4:c.34G>C	0.4048	COSM561
TROV-052-12-041-C1D1-T0-DNE_S8_L001_R1_001_variants.csv	SETBP1	NP_056374.2:p.Gly870Ser	NM_015559.2:c.2608G>A	0.4365	COSM1234973
TROV-052-12-041-C1D1-T0-DNE_S8_L001_R1_001_variants.csv	SRSF2	NP_001182356.1:p.Pro95Leu	NM_001195427.1:c.284C>T	0.5906	COSM211028
TROV-052-12-041-Scr-DNE_S7_L001_R1_001_variants.csv	ASXL1	NP_056153.2:p.Gly646TrpfsTer12	NM_015338.5:c.1934dup	0.3822	COSM1411076
TROV-052-12-041-Scr-DNE_S7_L001_R1_001_variants.csv	ASXL1	NP_056153.2:p.Val1367Ile	NM_015338.5:c.4099G>A	0.5358	COSM723114
TROV-052-12-041-Scr-DNE_S7_L001_R1_001_variants.csv	NRAS	NP_002515.1:p.Gly12Arg	NM_002524.4:c.34G>C	0.367	COSM561
TROV-052-12-041-Scr-DNE_S7_L001_R1_001_variants.csv	SETBP1	NP_056374.2:p.Gly870Ser	NM_015559.2:c.2608G>A	0.47	COSM1234973
TROV-052-12-041-Scr-DNE_S7_L001_R1_001_variants.csv	SRSF2	NP_001182356.1:p.Pro95Leu	NM_001195427.1:c.284C>T	0.5972	COSM211028
TROV052-12-045-BM_S3_L001_R1_001_variants.csv	DNMT3A	NP_001307822.1:p.Arg730His	NM_001320893.1:c.2189G>A	0.4626	COSM52944
TROV052-12-045-BM_S3_L001_R1_001_variants.csv	IDH2	NP_001276839.1:p.Arg120Lys	NM_001289910.1:c.359G>A	0.4742	COSM33733
TROV052-12-045-C1D1_S4_L001_R1_001_variants.csv	DNMT3A	NP_001307822.1:p.Arg730His	NM_001320893.1:c.2189G>A	0.5147	COSM52944
TROV052-12-045-C1D1_S4_L001_R1_001_variants.csv	IDH2	NP_001276839.1:p.Arg120Lys	NM_001289910.1:c.359G>A	0.481	COSM33733
TROV-052-12-048-C1D1-T0-DNE_S6_L001_R1_001_variants.csv	RUNX1	NP_001001890.1:p.Arg293Ter	NM_001001890.2:c.877C>T	0.3757	COSM41699
TROV-052-12-048-Scr-DNE_S5_L001_R1_001_variants.csv	RUNX1	NP_001001890.1:p.Arg293Ter	NM_001001890.2:c.877C>T	0.3237	COSM41699
